# Supplementary material
Source: PubMed Central journal article supplement (PMC5828882)
Supplement: NIHMS935447-supplement-supplement_1.pdf [file NIHMS935447-supplement-supplement_1.pdf]

|                     | Left Hemisphere |             |          | Right Hemisphere |             |          |
|---------------------|-----------------|-------------|----------|------------------|-------------|----------|
|                     | older age       | younger age | <i>p</i> | older age        | younger age | <i>P</i> |
| global              | 2.41 (.08)      | 2.58 (.13)  | <.001    | 2.42 (.08)       | 2.54 (.12)  | <.01     |
| Caudal ACC          | 2.57 (.28)      | 2.76 (.28)  | <.05     | 2.41 (.24)       | 2.49 (.32)  | .39      |
| Rostral ACC         | 2.74 (.27)      | 2.94 (.21)  | <.05     | 2.55 (.43)       | 2.70 (.30)  | .21      |
| Caudal MFG          | 2.44 (.11)      | 2.59 (.19)  | <.01     | 2.47 (.16)       | 2.49 (.21)  | .81      |
| Rostral MFG         | 2.23 (.13)      | 2.41 (.31)  | <.05     | 2.22 (.18)       | 2.32 (.29)  | .21      |
| Lateral OFC         | 2.43 (.12)      | 2.53 (.35)  | .26      | 2.49 (.19)       | 2.64 (.23)  | <.05     |
| Medial OFC          | 2.42 (.22)      | 2.59 (.35)  | .09      | 2.37 (.22)       | 2.40 (.24)  | .69      |
| Pars opercularis    | 2.51 (.12)      | 2.72 (.35)  | <.05     | 2.58 (.24)       | 2.66 (.18)  | .27      |
| Pars orbitalis      | 2.40 (.23)      | 2.56 (.53)  | .22      | 2.50 (.23)       | 2.64 (.30)  | .11      |
| Pars triangularis   | 2.28 (.11)      | 2.60 (.35)  | <.001    | 2.40 (.22)       | 2.58 (.26)  | <.05     |
| Superior frontal G. | 2.55 (.11)      | 2.73 (.17)  | <.01     | 2.53 (.12)       | 2.59 (.14)  | .20      |
| Frontal pole        | 2.39 (.36)      | 2.42 (.38)  | .80      | 2.25 (.33)       | 2.45 (.45)  | .14      |
| Insula              | 2.96 (.22)      | 3.05 (.22)  | .21      | 2.91 (.27)       | 3.02 (.28)  | .21      |

**S-Table 1: Mean Thickness of Global and ROI according to Age Group in Study 1;** unit: mm(millimeters) ; p-values refer to group differences comparing subjects of younger and older age

|                     | Left Hemisphere |             |          | Right Hemisphere |             |          |
|---------------------|-----------------|-------------|----------|------------------|-------------|----------|
|                     | older age       | younger age | <i>p</i> | older age        | younger age | <i>P</i> |
| global              | 2.24 (.12)      | 2.47 (.14)  | <.001    | 2.23 (.11)       | 2.45 (.13)  | <.001    |
| Caudal ACC          | 2.53 (.26)      | 2.65 (.22)  | .09      | 2.32 (.25)       | 2.48 (.20)  | <.05     |
| Rostral ACC         | 2.63 (.25)      | 2.86 (.28)  | <.01     | 2.55 (.30)       | 2.71 (.22)  | <.05     |
| Caudal MFG          | 2.34 (.16)      | 2.60 (.18)  | <.001    | 2.32 (.17)       | 2.52 (.15)  | <.001    |
| Rostral MFG         | 2.04 (.13)      | 2.24 (.21)  | <.001    | 1.96 (.16)       | 2.13 (.20)  | <.01     |
| Lateral OFC         | 2.31 (.16)      | 2.49 (.22)  | <.01     | 2.32 (.16)       | 2.47 (.25)  | <.05     |
| Medial OFC          | 2.15 (.19)      | 2.30 (.18)  | <.01     | 2.11 (.20)       | 2.25 (.22)  | <.05     |
| Pars opercularis    | 2.37 (.16)      | 2.59 (.16)  | <.001    | 2.35 (.13)       | 2.58 (.16)  | <.001    |
| Pars orbitalis      | 2.13 (.28)      | 2.40 (.36)  | <.01     | 2.19 (.20)       | 2.40 (.35)  | <.05     |
| Pars triangularis   | 2.17 (.19)      | 2.38 (.21)  | <.01     | 2.10 (.15)       | 2.33 (.18)  | <.001    |
| Superior frontal G. | 2.36 (.18)      | 2.70 (.21)  | <.001    | 2.30 (.20)       | 2.61 (.23)  | <.001    |
| Frontal pole        | 1.82 (.58)      | 2.18 (.70)  | .06      | 1.72 (.54)       | 2.09 (.61)  | <.05     |
| Insula              | 2.81 (.20)      | 3.10 (.16)  | <.001    | 2.80 (.17)       | 3.04 (.15)  | <.001    |

**S-Table 2: Mean Thickness of Global and ROI According to Age Group in Study 2;** unit: mm(millimeters) ; p-values refer to group differences comparing subjects of younger and older age

|                |       | Left Hemisphere |                 |                  |                 |                    |             | Right Hemisphere |                 |                  |          |                    |             |
|----------------|-------|-----------------|-----------------|------------------|-----------------|--------------------|-------------|------------------|-----------------|------------------|----------|--------------------|-------------|
|                |       | all subjects    |                 | <i>older age</i> |                 | <i>younger age</i> |             | all subjects     |                 | <i>older age</i> |          | <i>younger age</i> |             |
|                |       | <i>r</i>        | <i>p</i>        | <i>r</i>         | <i>p</i>        | <i>r</i>           | <i>p</i>    | <i>r</i>         | <i>p</i>        | <i>r</i>         | <i>p</i> | <i>r</i>           | <i>p</i>    |
| <b>Study 1</b> | Age   | <b>-.707**</b>  | <b>&lt;.001</b> | <b>-.725**</b>   | <b>&lt;.001</b> | <b>-.565*</b>      | <b>.012</b> | <b>-.617**</b>   | <b>&lt;.001</b> | -.427            | .068     | <b>-.561*</b>      | <b>.012</b> |
|                | RR    | <b>-.336*</b>   | <b>.039</b>     | -.169            | .490            | -.136              | .579        | -.173            | .298            | .008             | .973     | .101               | .680        |
|                | RMSSD | .228            | .169            | .184             | .452            | -.163              | .504        | .301             | .066            | .199             | .415     | .044               | .857        |
| <b>Study 2</b> | Age   | <b>-.707**</b>  | <b>&lt;.001</b> | -.141            | .522            | <b>-.492**</b>     | <b>.009</b> | <b>-.705**</b>   | <b>&lt;.001</b> | -.158            | .472     | <b>-.499**</b>     | <b>.008</b> |
|                | RR    | .055            | .703            | .091             | .680            | -.066              | .743        | .057             | .693            | .140             | .523     | -.141              | .483        |
|                | RMSSD | <b>.328*</b>    | <b>.020</b>     | .048             | .827            | .173               | .388        | <b>.307*</b>     | <b>.030</b>     | .072             | .745     | .093               | .644        |

**S-Table 3: Zero-Order Correlations of global Cortical Thickness with Age, Resting State Heart Rate (RR), and Resting State Heart Rate Variability (RMSSD) in Study 1 and Study 2;** values represent correlation coefficients (*r*) and their respective *p*-values; \* and bold: highlights a significant correlation on the  $p < .05$  level; \*\* and bold: highlights a significant correlation on the  $p < .01$  level

| Study 1             | Left Hemisphere |      | Right Hemisphere |      |
|---------------------|-----------------|------|------------------|------|
|                     | r               | p    | r                | p    |
| Caudal ACC          | -.099           | .560 | .060             | .722 |
| Rostral ACC         | .004            | .982 | .150             | .375 |
| Caudal MFG          | .052            | .760 | .076             | .655 |
| Rostral MFG         | -.094           | .579 | .175             | .301 |
| Lateral OFC         | .253            | .131 | .209             | .215 |
| Medial OFC          | -.113           | .504 | -.029            | .865 |
| Pars opercularis    | -.157           | .355 | .154             | .363 |
| Pars orbitalis      | .179            | .289 | .151             | .371 |
| Pars triangularis   | -.278           | .096 | .023             | .893 |
| Superior frontal G. | -.093           | .585 | -.028            | .868 |
| Frontal pole        | .056            | .746 | -.022            | .895 |
| Insula              | .174            | .303 | .035             | .838 |

**S-Table 4: Partial Correlations of Cortical Thickness in Selected Regions of Interest (ROI) with Resting State Heart Rate Variability when controlling age for each hemisphere (Study 1);** values represent correlation coefficients (r) and their respective p-values; ACC: anterior cingulate cortex; MFG: middle frontal gyrus; OFC: orbital frontal cortex; \* and bold: highlights a significant correlation on the  $p < .05$  level; \*\* and bold: highlights a significant correlation on the  $p < .01$  level

| Study 2             | Left Hemisphere |      | Right Hemisphere |      |
|---------------------|-----------------|------|------------------|------|
|                     | r               | p    | r                | p    |
| Caudal ACC          | .260            | .072 | .026             | .859 |
| Rostral ACC         | .288            | .045 | .031             | .834 |
| Caudal MFG          | .170            | .242 | .141             | .334 |
| Rostral MFG         | .097            | .507 | .017             | .909 |
| Lateral OFC         | .164            | .261 | .003             | .982 |
| Medial OFC          | .051            | .726 | .087             | .551 |
| Pars opercularis    | .197            | .176 | .091             | .535 |
| Pars orbitalis      | .000            | .999 | .048             | .741 |
| Pars triangularis   | .170            | .243 | .128             | .381 |
| Superior frontal G. | .104            | .475 | .078             | .594 |
| Frontal pole        | -.023           | .875 | -.063            | .669 |
| Insula              | .074            | .613 | .121             | .408 |

**S-Table 5: Partial Correlations of Cortical Thickness in Selected Regions of Interest (ROI) with Resting State Heart Rate Variability when controlling age for each hemisphere (Study 2);** values represent correlation coefficients (r) and their respective p-values; ACC: anterior cingulate cortex; MFG: middle frontal gyrus; OFC: orbital frontal cortex; \* and bold: highlights a significant correlation on the  $p < .05$  level; \*\* and bold: highlights a significant correlation on the  $p < .01$  level

| Study 1             | Left Hemisphere |          |                  |          |                    |          | Right Hemisphere |          |                  |             |                    |          |
|---------------------|-----------------|----------|------------------|----------|--------------------|----------|------------------|----------|------------------|-------------|--------------------|----------|
|                     | all subjects    |          | <i>older age</i> |          | <i>younger age</i> |          | all subjects     |          | <i>older age</i> |             | <i>younger age</i> |          |
|                     | <i>r</i>        | <i>p</i> | <i>r</i>         | <i>p</i> | <i>r</i>           | <i>p</i> | <i>r</i>         | <i>p</i> | <i>r</i>         | <i>p</i>    | <i>r</i>           | <i>p</i> |
| Caudal ACC          | .042            | .805     | -.099            | .697     | -.133              | .600     | .111             | .513     | -.153            | .544        | .173               | .492     |
| Rostral ACC         | .151            | .373     | -.101            | .691     | .119               | .637     | .157             | .352     | -.173            | .493        | .450               | .061     |
| Caudal MFG          | .152            | .368     | .329             | .183     | -.033              | .897     | .047             | .782     | .067             | .791        | .163               | .519     |
| Rostral MFG         | -.024           | .886     | .356             | .147     | -.201              | .423     | .202             | .229     | .343             | .163        | .159               | .530     |
| Lateral OFC         | .313            | .059     | .426             | .078     | .254               | .309     | .257             | .125     | <b>.595*</b>     | <b>.009</b> | .009               | .972     |
| Medial OFC          | -.037           | .826     | .169             | .503     | -.212              | .399     | -.022            | .896     | -.043            | .866        | .022               | .931     |
| Pars opercularis    | -.136           | .422     | .274             | .271     | -.290              | .243     | .187             | .268     | .280             | .260        | .153               | .544     |
| Pars orbitalis      | .217            | .197     | .233             | .352     | .226               | .366     | .162             | .337     | <b>.513*</b>     | <b>.030</b> | -.028              | .913     |
| Pars triangularis   | -.122           | .472     | -.143            | .570     | -.335              | .174     | .114             | .503     | .285             | .251        | -.094              | .711     |
| Superior frontal G. | .098            | .565     | -.182            | .469     | -.024              | .925     | -.023            | .894     | -.083            | .742        | .092               | .715     |
| Frontal pole        | .047            | .783     | .164             | .515     | .039               | .881     | .027             | .874     | .036             | .888        | .014               | .957     |
| Insula              | .230            | .172     | -.098            | .700     | .376               | .124     | -.017            | .922     | -.024            | .925        | .028               | .912     |

**S-Table 6: Partial Correlations of Cortical Thickness in Selected Regions of Interest (ROI) with Resting State Heart Rate Variability when controlling thickness of non-ROI regions for each hemisphere (Study 1);** values represent correlation coefficients (*r*) and their respective *p*-values; ACC: anterior cingulate cortex; MFG: middle frontal gyrus; OFC: orbital frontal cortex; \* and bold: highlights a significant correlation on the  $p < .05$  level; \*\* and bold: highlights a significant correlation on the  $p < .01$  level

| Study 2             | Left Hemisphere |             |                  |          |                    |          | Right Hemisphere |          |                  |             |                    |          |
|---------------------|-----------------|-------------|------------------|----------|--------------------|----------|------------------|----------|------------------|-------------|--------------------|----------|
|                     | all subjects    |             | <i>older age</i> |          | <i>younger age</i> |          | all subjects     |          | <i>older age</i> |             | <i>younger age</i> |          |
|                     | <i>r</i>        | <i>p</i>    | <i>r</i>         | <i>p</i> | <i>r</i>           | <i>p</i> | <i>r</i>         | <i>p</i> | <i>r</i>         | <i>p</i>    | <i>r</i>           | <i>p</i> |
| Caudal ACC          | .239            | .098        | .377             | .084     | .139               | .499     | .015             | .917     | .091             | .689        | -.106              | .607     |
| Rostral ACC         | <b>.315*</b>    | <b>.028</b> | .298             | .178     | .322               | .109     | .003             | .985     | -.033            | .884        | .068               | .740     |
| Caudal MFG          | .247            | .087        | .282             | .204     | .253               | .213     | .129             | .376     | .082             | .716        | .205               | .315     |
| Rostral MFG         | .075            | .609        | -.021            | .926     | .223               | .273     | -.043            | .772     | -.233            | .297        | .263               | .195     |
| Lateral OFC         | .133            | .363        | .236             | .290     | .157               | .443     | -.098            | .504     | .010             | .964        | -.069              | .739     |
| Medial OFC          | .082            | .575        | -.117            | .604     | .358               | .073     | .071             | .628     | .045             | .842        | .131               | .522     |
| Pars opercularis    | .250            | .083        | .223             | .318     | .341               | .088     | .100             | .493     | .144             | .523        | .011               | .958     |
| Pars orbitalis      | -.070           | .633        | -.350            | .111     | .284               | .160     | -.004            | .979     | -.180            | .424        | .244               | .230     |
| Pars triangularis   | .167            | .252        | .378             | .083     | .148               | .470     | .164             | .259     | .154             | .494        | .123               | .549     |
| Superior frontal G. | .175            | .228        | .004             | .987     | .254               | .211     | .077             | .600     | -.103            | .649        | .214               | .293     |
| Frontal pole        | -.116           | .429        | -.298            | .178     | .264               | .193     | -.158            | .279     | <b>-.463*</b>    | <b>.030</b> | .348               | .082     |
| Insula              | .091            | .536        | .180             | .423     | -.095              | .643     | .131             | .370     | .236             | .290        | -.092              | .653     |

**S-Table 7: Partial Correlations of Cortical Thickness in Selected Regions of Interest (ROI) with Resting State Heart Rate Variability when controlling thickness of non-ROI regions for each hemisphere (Study 2);** values represent correlation coefficients (*r*) and their respective *p*-values; ACC: anterior cingulate cortex; MFG: middle frontal gyrus; OFC: orbital frontal cortex; \* and bold: highlights a significant correlation on the  $p < .05$  level; \*\* and bold: highlights a significant correlation on the  $p < .01$  level

| Study 1             | Left Hemisphere |             |                  |      |                    |      | Right Hemisphere |      |                  |      |                    |      |
|---------------------|-----------------|-------------|------------------|------|--------------------|------|------------------|------|------------------|------|--------------------|------|
|                     | all subjects    |             | <i>older age</i> |      | <i>younger age</i> |      | all subjects     |      | <i>older age</i> |      | <i>younger age</i> |      |
|                     | r               | p           | r                | p    | r                  | p    | r                | p    | r                | p    | r                  | p    |
| Caudal ACC          | <b>-.349*</b>   | <b>.032</b> | -.211            | .387 | -.358              | .132 | -.085            | .611 | .067             | .786 | -.177              | .468 |
| Rostral ACC         | -.313           | .055        | -.239            | .325 | -.092              | .709 | .022             | .895 | .150             | .540 | .021               | .932 |
| Caudal MFG          | -.125           | .454        | .149             | .542 | -.029              | .905 | .063             | .709 | -.087            | .723 | .356               | .134 |
| Rostral MFG         | -.278           | .091        | -.188            | .442 | -.214              | .380 | -.139            | .406 | -.239            | .325 | .119               | .627 |
| Lateral OFC         | -.028           | .867        | .156             | .523 | .007               | .977 | .002             | .990 | .206             | .396 | .101               | .681 |
| Medial OFC          | -.222           | .180        | -.090            | .715 | -.213              | .382 | -.036            | .828 | .130             | .595 | -.263              | .276 |
| Pars opercularis    | -.184           | .268        | .157             | .520 | -.198              | .415 | -.143            | .393 | -.211            | .387 | .240               | .323 |
| Pars orbitalis      | .065            | .697        | .308             | .200 | .117               | .635 | -.045            | .790 | .211             | .385 | -.130              | .597 |
| Pars triangularis   | -.263           | .110        | .098             | .689 | -.204              | .402 | -.273            | .097 | -.249            | .305 | -.038              | .876 |
| Superior frontal G. | -.319           | .051        | -.192            | .430 | -.125              | .609 | -.184            | .270 | -.236            | .330 | .054               | .825 |
| Frontal pole        | -.065           | .703        | -.070            | .775 | -.028              | .913 | -.166            | .319 | -.198            | .416 | .061               | .803 |
| Insula              | -.027           | .874        | -.031            | .901 | .232               | .339 | .078             | .643 | .241             | .320 | .081               | .741 |

**S-Table 8: Zero-Order Correlations of Cortical Thickness in Selected Regions of Interest (ROI) with Resting State Heart Rate (RR) (Study 1);** values represent correlation coefficients (r) and their respective p-values; ACC: anterior cingulate cortex; MFG: middle frontal gyrus; OFC: orbital frontal cortex; \* and bold: highlights a significant correlation on the  $p < .05$  level; \*\* and bold: highlights a significant correlation on the  $p < .01$  level



| Study 2             | Left Hemisphere |          |                  |          |                    |          | Right Hemisphere |          |                  |          |                    |          |
|---------------------|-----------------|----------|------------------|----------|--------------------|----------|------------------|----------|------------------|----------|--------------------|----------|
|                     | all subjects    |          | <i>older age</i> |          | <i>younger age</i> |          | all subjects     |          | <i>older age</i> |          | <i>younger age</i> |          |
|                     | <i>r</i>        | <i>p</i> | <i>r</i>         | <i>p</i> | <i>r</i>           | <i>p</i> | <i>r</i>         | <i>p</i> | <i>r</i>         | <i>p</i> | <i>r</i>           | <i>p</i> |
| Caudal ACC          | .160            | .267     | .205             | .347     | .055               | .785     | .120             | .405     | .214             | .326     | -.115              | .568     |
| Rostral ACC         | .176            | .220     | .178             | .417     | .194               | .332     | .142             | .326     | .264             | .224     | -.180              | .368     |
| Caudal MFG          | .097            | .502     | .176             | .422     | -.058              | .773     | .029             | .842     | .063             | .776     | -.126              | .532     |
| Rostral MFG         | -.003           | .985     | .004             | .987     | -.087              | .666     | .025             | .865     | .035             | .874     | -.045              | .824     |
| Lateral OFC         | .070            | .628     | .094             | .670     | .017               | .935     | .006             | .967     | .177             | .420     | -.236              | .236     |
| Medial OFC          | .079            | .585     | -.005            | .983     | .197               | .325     | .215             | .134     | .336             | .117     | .039               | .846     |
| Pars opercularis    | .169            | .241     | .204             | .351     | .136               | .498     | .151             | .296     | .376             | .077     | -.140              | .488     |
| Pars orbitalis      | .043            | .769     | -.120            | .587     | .229               | .251     | .057             | .694     | .126             | .567     | -.028              | .888     |
| Pars triangularis   | .150            | .297     | .188             | .390     | .101               | .617     | .126             | .385     | .305             | .157     | -.120              | .552     |
| Superior frontal G. | .041            | .777     | .030             | .893     | -.028              | .889     | .041             | .775     | .043             | .846     | -.033              | .869     |
| Frontal pole        | .026            | .859     | -.002            | .991     | .034               | .866     | -.089            | .538     | -.144            | .512     | -.085              | .672     |
| Insula              | .086            | .553     | .137             | .533     | -.090              | .655     | .133             | .356     | .282             | .192     | -.181              | .366     |

**S-Table 9: Zero-Order Correlations of Cortical Thickness in Selected Regions of Interest (ROI) with Resting State Heart Rate (RR) (Study 2);** values represent correlation coefficients (*r*) and their respective *p*-values; ACC: anterior cingulate cortex; MFG: middle frontal gyrus; OFC: orbital frontal cortex; \* and bold: highlights a significant correlation on the  $p < .05$  level; \*\* and bold: highlights a significant correlation on the  $p < .01$  level
